# Supplementary material for: Resting Heart Rate and Risk of Incident Heart Failure: Three Prospective Cohort Studies and a Systematic Meta‐Analysis
Source: PubMed Central journal article supplement — J Am Heart Assoc. 2015 Jan 14;4(1):e001364. doi: 10.1161/JAHA.114.001364 (PMC4330063; doi:10.1161/jaha.114.001364), 2015-01-14
Supplement: jah3-4-e001364-s1.pdf [file jah3-4-e001364-s1.pdf]

## **SUPPLEMENTAL MATERIAL**

## Appendix 1. PRISMA 2009 check-list

| Section/topic                      | Item No | Checklist item                                                                                                                                                                                                                                                                                         | Reported on page No |
|------------------------------------|---------|--------------------------------------------------------------------------------------------------------------------------------------------------------------------------------------------------------------------------------------------------------------------------------------------------------|---------------------|
| <b>Title</b>                       |         |                                                                                                                                                                                                                                                                                                        |                     |
| Title                              | 1       | Identify the report as a systematic review, meta-analysis, or both                                                                                                                                                                                                                                     | 1                   |
| <b>Abstract</b>                    |         |                                                                                                                                                                                                                                                                                                        |                     |
| Structured summary                 | 2       | Provide a structured summary including, as applicable, background, objectives, data sources, study eligibility criteria, participants, interventions, study appraisal and synthesis methods, results, limitations, conclusions and implications of key findings, systematic review registration number | 2                   |
| <b>Introduction</b>                |         |                                                                                                                                                                                                                                                                                                        |                     |
| Rationale                          | 3       | Describe the rationale for the review in the context of what is already known                                                                                                                                                                                                                          | 3                   |
| Objectives                         | 4       | Provide an explicit statement of questions being addressed with reference to participants, interventions, comparisons, outcomes, and study design (PICOS)                                                                                                                                              | 4                   |
| <b>Methods</b>                     |         |                                                                                                                                                                                                                                                                                                        |                     |
| Protocol and registration          | 5       | Indicate if a review protocol exists, if and where it can be accessed (such as web address), and, if available, provide registration information including registration number                                                                                                                         | 4                   |
| Eligibility criteria               | 6       | Specify study characteristics (such as PICOS, length of follow-up) and report characteristics (such as years considered, language, publication status) used as criteria for eligibility, giving rationale                                                                                              | 4                   |
| Information sources                | 7       | Describe all information sources (such as databases with dates of coverage, contact with study authors to identify additional studies) in the search and date last searched                                                                                                                            | 4                   |
| Search                             | 8       | Present full electronic search strategy for at least one database, including any limits used, such that it could be repeated                                                                                                                                                                           | eFigure1            |
| Study selection                    | 9       | State the process for selecting studies (that is, screening, eligibility, included in systematic review, and, if applicable, included in the meta-analysis)                                                                                                                                            | 4-5                 |
| Data collection process            | 10      | Describe method of data extraction from reports (such as piloted forms, independently, in duplicate) and any processes for obtaining and confirming data from investigators                                                                                                                            | 4-6                 |
| Data items                         | 11      | List and define all variables for which data were sought (such as PICOS, funding sources) and any assumptions and simplifications made                                                                                                                                                                 | 5-6                 |
| Risk of bias in individual studies | 12      | Describe methods used for assessing risk of bias of individual studies (including specification of whether this was done at the study or outcome level), and how this information is to be used in any data synthesis                                                                                  | 6-7                 |
| Summary measures                   | 13      | State the principal summary measures (such as risk ratio, difference in means).                                                                                                                                                                                                                        | 6-7                 |
| Synthesis of results               | 14      | Describe the methods of handling data and combining results of studies, if done, including measures of consistency (such as $I^2$ statistic) for each meta-analysis                                                                                                                                    | 6-7                 |
| Risk of bias across studies        | 15      | Specify any assessment of risk of bias that may affect the cumulative evidence (such as publication bias, selective reporting within studies)                                                                                                                                                          | 6-7                 |

| <b>Section/topic</b>          | <b>Item No</b> | <b>Checklist item</b>                                                                                                                                                                                     | <b>Reported on page No</b> |
|-------------------------------|----------------|-----------------------------------------------------------------------------------------------------------------------------------------------------------------------------------------------------------|----------------------------|
| Additional analyses           | 16             | Describe methods of additional analyses (such as sensitivity or subgroup analyses, meta-regression), if done, indicating which were pre-specified                                                         | 6-7                        |
| <b>Results</b>                |                |                                                                                                                                                                                                           |                            |
| Study selection               | 17             | Give numbers of studies screened, assessed for eligibility, and included in the review, with reasons for exclusions at each stage, ideally with a flow diagram                                            | 7-8 and eFigure 1          |
| Study characteristics         | 18             | For each study, present characteristics for which data were extracted (such as study size, PICOS, follow-up period) and provide the citations                                                             | 7-8, Table 4               |
| Risk of bias within studies   | 19             | Present data on risk of bias of each study and, if available, any outcome-level assessment (see item 12).                                                                                                 | 8-9, Table 4               |
| Results of individual studies | 20             | For all outcomes considered (benefits or harms), present for each study (a) simple summary data for each intervention group and (b) effect estimates and confidence intervals, ideally with a forest plot | 8-9                        |
| Synthesis of results          | 21             | Present results of each meta-analysis done, including confidence intervals and measures of consistency                                                                                                    | 8-9                        |
| Risk of bias across studies   | 22             | Present results of any assessment of risk of bias across studies (see item 15)                                                                                                                            | 8-9                        |
| Additional analysis           | 23             | Give results of additional analyses, if done (such as sensitivity or subgroup analyses, meta-regression) (see item 16)                                                                                    | 8-9                        |
| <b>Discussion</b>             |                |                                                                                                                                                                                                           |                            |
| Summary of evidence           | 24             | Summarize the main findings including the strength of evidence for each main outcome; consider their relevance to key groups (such as health care providers, users, and policy makers)                    | 10-12                      |
| Limitations                   | 25             | Discuss limitations at study and outcome level (such as risk of bias), and at review level (such as incomplete retrieval of identified research, reporting bias)                                          | 11-12                      |
| Conclusions                   | 26             | Provide a general interpretation of the results in the context of other evidence, and implications for future research                                                                                    | 13                         |
| <b>Funding</b>                |                |                                                                                                                                                                                                           |                            |
| Funding                       | 27             | Describe sources of funding for the systematic review and other support (such as supply of data) and role of funders for the systematic review                                                            | None                       |

## Appendix 2. MOOSE checklist

| Criteria                                           |                                                                                                            | Brief description of how the criteria were handled in the review                                                                                                                                                                                                                                    |
|----------------------------------------------------|------------------------------------------------------------------------------------------------------------|-----------------------------------------------------------------------------------------------------------------------------------------------------------------------------------------------------------------------------------------------------------------------------------------------------|
| <b>Reporting of background</b>                     |                                                                                                            |                                                                                                                                                                                                                                                                                                     |
| <input checked="" type="checkbox"/>                | Problem definition                                                                                         | The relationship between resting heart rate and heart failure risk has not been reliably quantified. We report new findings from three population-based studies, and a meta-analysis                                                                                                                |
| <input checked="" type="checkbox"/>                | Hypothesis statement                                                                                       | Elevated resting heart rate is associated with increased risk of heart failure                                                                                                                                                                                                                      |
| <input checked="" type="checkbox"/>                | Description of study outcomes                                                                              | Incident heart failure                                                                                                                                                                                                                                                                              |
| <input checked="" type="checkbox"/>                | Type of exposure                                                                                           | Resting heart rate                                                                                                                                                                                                                                                                                  |
| <input checked="" type="checkbox"/>                | Type of study designs used                                                                                 | Prospective (cohort, case-cohort or “nested case control”) population-based studies                                                                                                                                                                                                                 |
| <input checked="" type="checkbox"/>                | Study population                                                                                           | Individuals without pre-existing overt heart disease                                                                                                                                                                                                                                                |
| <b>Reporting of search strategy should include</b> |                                                                                                            |                                                                                                                                                                                                                                                                                                     |
| <input checked="" type="checkbox"/>                | Qualifications of searchers                                                                                | Hassan Khan, MD,PhD; Setor Kunutsor, MD                                                                                                                                                                                                                                                             |
| <input checked="" type="checkbox"/>                | Search strategy, including time period included in the synthesis and keywords                              | Time period: from inception of MEDLINE, EMBASE, Web of Science February 2014.<br><b>Search strategy:</b><br>1 (Heart rate"[MeSH] OR "heart rate"[All Fields])<br>2 ("Heart Failure"[MeSH] OR "Heart Failure"[Majr] OR "heart failure"[All Fields])<br>3 ("humans"[MeSH Terms])<br>4 (1 AND 2 AND 3) |
| <input checked="" type="checkbox"/>                | Databases and registries searched                                                                          | MEDLINE, EMBASE, and Web of Science                                                                                                                                                                                                                                                                 |
| <input checked="" type="checkbox"/>                | Search software used, name and version, including special features                                         | Ovid was used to search EMBASE<br>Reference Manager used to manage references                                                                                                                                                                                                                       |
| <input checked="" type="checkbox"/>                | Use of hand searching                                                                                      | We searched bibliographies of retrieved papers                                                                                                                                                                                                                                                      |
| <input checked="" type="checkbox"/>                | List of citations located and those excluded, including justifications                                     | Details of the literature search process are outlined in the flow chart. The citation list for excluded studies is available upon request.                                                                                                                                                          |
| <input checked="" type="checkbox"/>                | Method of addressing articles published in languages other than English                                    | We placed no restrictions on language                                                                                                                                                                                                                                                               |
| <input checked="" type="checkbox"/>                | Method of handling abstracts and unpublished studies                                                       | None found                                                                                                                                                                                                                                                                                          |
| <input checked="" type="checkbox"/>                | Description of any contact with authors                                                                    | Not applicable                                                                                                                                                                                                                                                                                      |
| <b>Reporting of methods should include</b>         |                                                                                                            |                                                                                                                                                                                                                                                                                                     |
| <input checked="" type="checkbox"/>                | Description of relevance or appropriateness of studies assembled for assessing the hypothesis to be tested | Detailed inclusion and exclusion criteria are described in the Methods section.                                                                                                                                                                                                                     |
| <input checked="" type="checkbox"/>                | Rationale for the selection and coding of data                                                             | Data extracted from each of the studies were relevant to the population characteristics, study design, exposure, outcome, and possible effect modifiers of the association.                                                                                                                         |
| <input checked="" type="checkbox"/>                | Assessment of confounding                                                                                  | We assessed confounding by ranking individual studies on the basis of different adjustment levels, and performed sub-group analyses to evaluate differences in the overall estimates according to levels of adjustment.                                                                             |

|                                                |                                                                                                                                            |                                                                                                                                                                                                                                                                                                                                       |
|------------------------------------------------|--------------------------------------------------------------------------------------------------------------------------------------------|---------------------------------------------------------------------------------------------------------------------------------------------------------------------------------------------------------------------------------------------------------------------------------------------------------------------------------------|
| <input checked="" type="checkbox"/>            | Assessment of study quality, including blinding of quality assessors; stratification or regression on possible predictors of study results | Study quality was assessed based on the nine-star Newcastle–Ottawa Scale using pre-defined criteria namely: population representativeness, comparability (adjustment of confounders), ascertainment of outcome. Sensitivity analyses by several quality indicators such as study size, duration of follow-up, and adjustment factors. |
| <input checked="" type="checkbox"/>            | Assessment of heterogeneity                                                                                                                | Heterogeneity of the studies was explored with $I^2$ statistic that provides the relative amount of variance of the summary effect due to the between-study heterogeneity.                                                                                                                                                            |
| <input checked="" type="checkbox"/>            | Description of statistical methods in sufficient detail to be replicated                                                                   | Description of methods of meta-analyses, sensitivity analyses, meta-regression and assessment of publication bias are detailed in the methods. We performed random effects meta-analysis with Stata 12.                                                                                                                               |
| <input checked="" type="checkbox"/>            | Provision of appropriate tables and graphics                                                                                               | Table 1, Figures 1-4, Supplemental Tables                                                                                                                                                                                                                                                                                             |
| <b>Reporting of results should include</b>     |                                                                                                                                            |                                                                                                                                                                                                                                                                                                                                       |
| <input checked="" type="checkbox"/>            | Graph summarizing individual study estimates and overall estimate                                                                          | Figure 4                                                                                                                                                                                                                                                                                                                              |
| <input checked="" type="checkbox"/>            | Table giving descriptive information for each study included                                                                               | Table(s) 1&4                                                                                                                                                                                                                                                                                                                          |
| <input checked="" type="checkbox"/>            | Results of sensitivity testing                                                                                                             | Sensitivity analysis was conducted to assess the influence of each individual study by omitting one study at a time and calculating a pooled estimate for the remainder of the studies. Results section                                                                                                                               |
| <input checked="" type="checkbox"/>            | Indication of statistical uncertainty of findings                                                                                          | 95% confidence intervals were presented with all summary estimates, $I^2$ values and results of sensitivity analyses                                                                                                                                                                                                                  |
| <b>Reporting of discussion should include</b>  |                                                                                                                                            |                                                                                                                                                                                                                                                                                                                                       |
| <input checked="" type="checkbox"/>            | Quantitative assessment of bias                                                                                                            | Sensitivity analyses indicate heterogeneity in strengths of the association due to most common biases in observational studies.                                                                                                                                                                                                       |
| <input checked="" type="checkbox"/>            | Justification for exclusion                                                                                                                | All studies were excluded based on the pre-defined inclusion criteria in methods section.                                                                                                                                                                                                                                             |
| <input checked="" type="checkbox"/>            | Assessment of quality of included studies                                                                                                  | Brief discussion included in 'Methods' section                                                                                                                                                                                                                                                                                        |
| <b>Reporting of conclusions should include</b> |                                                                                                                                            |                                                                                                                                                                                                                                                                                                                                       |
| <input checked="" type="checkbox"/>            | Consideration of alternative explanations for observed results                                                                             | Discussed in the context of the results.                                                                                                                                                                                                                                                                                              |
| <input checked="" type="checkbox"/>            | Generalization of the conclusions                                                                                                          | Discussed in the context of the results.                                                                                                                                                                                                                                                                                              |
| <input checked="" type="checkbox"/>            | Guidelines for future research                                                                                                             | We recommend analyses that would correct for regression dilution bias.                                                                                                                                                                                                                                                                |
| <input checked="" type="checkbox"/>            | Disclosure of funding source                                                                                                               | No separate funding was necessary for the undertaking of this systematic review.                                                                                                                                                                                                                                                      |
